# Supplementary material for: RNA thermoswitches modulate Staphylococcus aureus adaptation to ambient temperatures
Source: PubMed Central journal article supplement — Nucleic Acids Res. 2021 Feb 28;49(6):3409–26. doi: 10.1093/nar/gkab117 (PMC8034633; doi:10.1093/nar/gkab117), 2021-02-28
Supplement: gkab117_supplemental_file.pdf [file gkab117_supplemental_file.pdf]

## Supplementary Data for

### **RNA thermoswitches modulate *Staphylococcus aureus* adaptation to ambient temperatures**

Arancha Catalan-Moreno<sup>1</sup>, Marta Cela<sup>1</sup>, Pilar Menendez-Gil<sup>1</sup>, Naiara Irurzun<sup>1</sup>,  
Carlos J. Caballero<sup>1</sup>, Isabelle Caldelari<sup>2</sup> and Alejandro Toledo-Arana<sup>1\*</sup>

<sup>1</sup>Instituto de Agrobiotecnología. IDAB, CSIC-UPNA-Gobierno de Navarra. 31192-Mutilva, Navarra, Spain.

<sup>2</sup>Université de Strasbourg, CNRS, Architecture et Réactivité de l'ARN, UPR9002, F-67000-Strasbourg, France

\*Corresponding author: Laboratory of Bacterial Gene Regulation, Instituto de Agrobiotecnología, CSIC-UPNA-Gobierno de Navarra, Avda. de Pamplona 123, 31192-Mutilva, Navarra, Spain  
E-mail: a.toledo.arana@csic.es  
Phone: +34 948 16 9752

This PDF file includes:

Supplementary Tables S1 to S5

Supplementary Figures S1 to S8

Supplementary References

## SUPPLEMENTARY TABLES

**Table S1.** Strains used in this study

| Strains                                                        | Relevant characteristic(s)                                                                       | BGR ID <sup>a</sup> | Source or reference |
|----------------------------------------------------------------|--------------------------------------------------------------------------------------------------|---------------------|---------------------|
| <i>Staphylococcus aureus</i>                                   |                                                                                                  |                     |                     |
| 15981                                                          | Wild type (WT) strain. MSSA clinical isolate; biofilm positive; PNAG-dependent biofilm matrix    | 8                   | (3)                 |
| <i>cspA</i> <sup>3xF</sup>                                     | 15981 strain expressing the chromosomal 3xFLAG-tagged CspA protein                               | 239                 | (4)                 |
| <i>cspB</i> <sup>3xF</sup>                                     | 15981 strain expressing the chromosomal 3xFLAG-tagged CspB protein                               | 346                 | This study          |
| <i>cspC</i> <sup>3xF</sup>                                     | 15981 strain expressing the chromosomal 3xFLAG-tagged CspC protein                               | 240                 | This study          |
| WT p5'UTR <sup>cspB</sup> - <i>gfp</i>                         | 15981 carrying the p5'UTR <sup>cspB</sup> - <i>gfp</i> plasmid                                   | 1570                | This study          |
| WT p5'UTR <sup>cspC</sup> - <i>gfp</i>                         | 15981 carrying the p5'UTR <sup>cspC</sup> - <i>gfp</i> plasmid                                   | 1398                | This study          |
| WT p5'UTR <sup>cspB</sup> Δ24- <i>gfp</i>                      | 15981 carrying the p5'UTR <sup>cspB</sup> Δ24- <i>gfp</i> plasmid                                | 1555                | This study          |
| WT p5'UTR <sup>cspC</sup> Δ24- <i>gfp</i>                      | 15981 carrying the p5'UTR <sup>cspC</sup> Δ24- <i>gfp</i> plasmid                                | 1429                | This study          |
| WT p5'UTR <sup>cspB</sup> U47AA- <i>gfp</i>                    | 15981 carrying the p5'UTR <sup>cspB</sup> U47AA- <i>gfp</i> plasmid                              | 1623                | This study          |
| WT p5'UTR <sup>cspB</sup> C50G- <i>gfp</i>                     | 15981 carrying the p5'UTR <sup>cspB</sup> C50G- <i>gfp</i> plasmid                               | 1579                | This study          |
| WT p5'UTR <sup>cspB</sup> UU55AA- <i>gfp</i>                   | 15981 carrying the p5'UTR <sup>cspB</sup> UU55AA- <i>gfp</i> plasmid                             | 1517                | This study          |
| WT p5'UTR <sup>cspC</sup> UU48A- <i>gfp</i>                    | 15981 carrying the p5'UTR <sup>cspC</sup> UU48A- <i>gfp</i> plasmid                              | 1415                | This study          |
| WT p5'UTR <sup>cspB</sup> UU55AA+UU26AA- <i>gfp</i>            | 15981 carrying the p5'UTR <sup>cspB</sup> UU55AA+UU26AA- <i>gfp</i> plasmid                      | 1902                | This study          |
| WT p5'UTR <sup>cspB</sup> U38C+U41C- <i>gfp</i>                | 15981 carrying the p5'UTR <sup>cspB</sup> U38C+U41C- <i>gfp</i> plasmid                          | 2092                | This study          |
| Δ <i>cspA</i> p5'UTR <sup>cspB</sup> - <i>gfp</i>              | 15981 Δ <i>cspA</i> strain carrying the p5'UTR <sup>cspB</sup> - <i>gfp</i> plasmid              | 1571                | This study          |
| Δ <i>cspA</i> p5'UTR <sup>cspC</sup> - <i>gfp</i>              | 15981 Δ <i>cspA</i> strain carrying the p5'UTR <sup>cspC</sup> - <i>gfp</i> plasmid              | 1408                | This study          |
| Δ <i>cspB</i> p5'UTR <sup>cspB</sup> - <i>gfp</i>              | 15981 Δ <i>cspB</i> strain carrying the p5'UTR <sup>cspB</sup> - <i>gfp</i> plasmid              | 1572                | This study          |
| Δ <i>cspC</i> p5'UTR <sup>cspC</sup> - <i>gfp</i>              | 15981 Δ <i>cspC</i> strain carrying the p5'UTR <sup>cspC</sup> - <i>gfp</i> plasmid              | 1561                | This study          |
| <i>cspB</i> <sup>3xF</sup> Δ <i>cspA</i>                       | 15981 Δ <i>cspA</i> strain expressing the chromosomal 3xFLAG-tagged CspB protein                 | 1324                | This study          |
| <i>cspC</i> <sup>3xF</sup> Δ <i>cspA</i>                       | 15981 Δ <i>cspA</i> strain expressing the chromosomal 3xFLAG-tagged CspC protein                 | 725                 | This study          |
| Δ <i>cspA</i> p5'UTR <sup>cspB</sup> Δ24- <i>gfp</i>           | 15981 Δ <i>cspA</i> strain carrying the p5'UTR <sup>cspB</sup> Δ24- <i>gfp</i> plasmid           | 1566                | This study          |
| Δ <i>cspA</i> p5'UTR <sup>cspB</sup> U47AA- <i>gfp</i>         | 15981 Δ <i>cspA</i> strain carrying the p5'UTR <sup>cspB</sup> U47AA- <i>gfp</i> plasmid         | 2028                | This study          |
| Δ <i>cspA</i> p5'UTR <sup>cspB</sup> C50G- <i>gfp</i>          | 15981 Δ <i>cspA</i> strain carrying the p5'UTR <sup>cspB</sup> C50G- <i>gfp</i> plasmid          | 1928                | This study          |
| Δ <i>cspA</i> p5'UTR <sup>cspB</sup> UU55AA- <i>gfp</i>        | 15981 Δ <i>cspA</i> strain carrying the p5'UTR <sup>cspB</sup> UU55AA- <i>gfp</i> plasmid        | 1928                | This study          |
| Δ <i>cspA</i> p5'UTR <sup>cspC</sup> Δ24- <i>gfp</i>           | 15981 Δ <i>cspA</i> strain carrying the p5'UTR <sup>cspC</sup> Δ24- <i>gfp</i> plasmid           | 1516                | This study          |
| Δ <i>cspA</i> p5'UTR <sup>cspC</sup> UU48A- <i>gfp</i>         | 15981 Δ <i>cspA</i> strain carrying the p5'UTR <sup>cspC</sup> UU48A- <i>gfp</i> plasmid         | 1416                | This study          |
| Δ <i>cspA</i> p5'UTR <sup>cspB</sup> UU55AA+UU26AA- <i>gfp</i> | 15981 Δ <i>cspA</i> strain carrying the p5'UTR <sup>cspB</sup> UU55AA+UU26AA- <i>gfp</i> plasmid | 1749                | This study          |
| Δ <i>cspA</i> p5'UTR <sup>cspB</sup> U38C+U41C- <i>gfp</i>     | 15981 Δ <i>cspA</i> strain carrying the p5'UTR <sup>cspB</sup> U38C+U41C- <i>gfp</i> plasmid     | 2093                | This study          |
| Δ <i>cspB</i>                                                  | 15981 strain with deletion of the <i>cspB</i> gene                                               | 1150                | (5)                 |
| Δ <i>cspC</i>                                                  | 15981 strain with deletion of the <i>cspC</i> gene                                               | 195                 | (5)                 |
| Δ <i>cspBC</i>                                                 | 15981 strain with deletion of the <i>cspB</i> and <i>cspC</i> genes                              | 1251                | This study          |

Continued in the following page

**Table S1. Continued**

| Strains                      | Relevant characteristic(s)                                                                                       | BGR ID <sup>a</sup> | Source or reference <sup>b</sup> |
|------------------------------|------------------------------------------------------------------------------------------------------------------|---------------------|----------------------------------|
| <i>Δ24cspB</i>               | 15981 strain harbouring a chromosomal deletion of the first 24 nucleotides of the <i>cspB</i> mRNA               | 1975                | This study                       |
| <i>Δ24cspC</i>               | 15981 strain harbouring a chromosomal deletion of the first 24 nucleotides of the <i>cspC</i> mRNA               | 1987                | This study                       |
| <i>Δ24cspB<sup>3xF</sup></i> | 15981 <i>cspB<sup>3xF</sup></i> strain harbouring a deletion of the first 24 nucleotides of the <i>cspB</i> mRNA | 1991                | This study                       |
| <i>Δ24cspC<sup>3xF</sup></i> | 15981 <i>cspC<sup>3xF</sup></i> strain harbouring a deletion of the first 24 nucleotides of the <i>cspC</i> mRNA | 1992                | This study                       |
| <i>Δ24cspBC</i>              | 15981 strain harbouring a deletion of the first 24 nucleotides of the <i>cspB</i> and <i>cspC</i> mRNAs          | 1917                | This study                       |
| <i>Escherichia coli</i>      |                                                                                                                  |                     |                                  |
| XL1-Blue                     | Strain used for cloning experiments                                                                              | 1                   | Stratagene                       |
| IMO1B                        | Strain used for cloning experiments                                                                              | 1837                | (6)                              |

<sup>a</sup> Identification number of the strains stored at the Laboratory of Bacterial Gene Regulation.

**Table S2. Plasmids used in this study**

| Plasmids                                         | Relevant characteristic(s)                                                                                                                                                                                                                                               | Source or reference |
|--------------------------------------------------|--------------------------------------------------------------------------------------------------------------------------------------------------------------------------------------------------------------------------------------------------------------------------|---------------------|
| pMAD_ <i>cspB</i> <sup>3xF</sup>                 | pMAD plasmid containing the allele for insertion of the 3xFLAG at the C-terminus of the CspB protein                                                                                                                                                                     | This study          |
| pMAD_ <i>cspC</i> <sup>3xF</sup>                 | pMAD plasmid containing the allele for insertion of the 3xFLAG at the C-terminus of the CspB protein                                                                                                                                                                     | This study          |
| pCN57                                            | <i>E. coli</i> - <i>S. aureus</i> shuttle vector carrying the promoter-less <i>gfpmut2</i> reporter gene. Amp <sup>R</sup> -Erm <sup>R</sup>                                                                                                                             | (7)                 |
| pCN47                                            | <i>E. coli</i> - <i>S. aureus</i> shuttle vector for cloning. Amp <sup>R</sup> -Erm <sup>R</sup>                                                                                                                                                                         | (7)                 |
| pHRG                                             | pCN47 plasmid containing the <i>Phyper</i> constitutive promoter, <i>icaR</i> RBS and <i>gfp</i> reporter gene                                                                                                                                                           | This study          |
| p5'UTR <sup>cspB</sup> - <i>gfp</i>              | pHRG translation-reporter plasmid carrying the <i>cspB</i> 5'UTR fused to the <i>gfp</i> reporter gene                                                                                                                                                                   | This study          |
| p5'UTR <sup>cspC</sup> - <i>gfp</i>              | pHRG translation-reporter plasmid carrying the <i>cspC</i> 5'UTR fused to the <i>gfp</i> reporter gene                                                                                                                                                                   | This study          |
| p5'UTR <sup>cspB</sup> Δ24- <i>gfp</i>           | pHRG translation reporter plasmid carrying the <i>cspB</i> 5'UTR that lacks the first 24 nt                                                                                                                                                                              | This study          |
| p5'UTR <sup>cspC</sup> Δ24- <i>gfp</i>           | pHRG translation reporter plasmid carrying the <i>cspC</i> 5'UTR that lacks the first 24 nt                                                                                                                                                                              | This study          |
| p5'UTR <sup>cspB</sup> UAU47AA- <i>gfp</i>       | pHRG translation reporter plasmid carrying the <i>cspB</i> 5'UTR in which nucleotides 47-UAU-49 were replaced by AA                                                                                                                                                      | This study          |
| p5'UTR <sup>cspB</sup> C50G- <i>gfp</i>          | pHRG translation reporter plasmid carrying the <i>cspB</i> 5'UTR in which nucleotide 50C was substituted by G                                                                                                                                                            | This study          |
| p5'UTR <sup>cspB</sup> UU55AA- <i>gfp</i>        | pHRG translation reporter plasmid carrying the <i>cspB</i> 5'UTR in which nucleotides 55-UU-56 were substituted by AA                                                                                                                                                    | This study          |
| p5'UTR <sup>cspC</sup> UU48A- <i>gfp</i>         | pHRG translation reporter plasmid carrying the <i>cspC</i> 5'UTR in which nucleotides 48-UU-49 were substituted by A                                                                                                                                                     | This study          |
| p5'UTR <sup>cspB</sup> UU55AA+UU26AA- <i>gfp</i> | p5'UTR <sup>cspB</sup> UU55AA- <i>gfp</i> plasmid carrying an additional mutation in which nucleotides 26-UU-27 were substituted by AA                                                                                                                                   | This study          |
| p5'UTR <sup>cspB</sup> UU26AA- <i>gfp</i>        | pHRG translation reporter plasmid carrying the <i>cspB</i> 5'UTR in which nucleotides 26-UU-27 were substituted by AA                                                                                                                                                    | This study          |
| p5'UTR <sup>cspB</sup> U38C+U41C- <i>gfp</i>     | pHRG translation reporter plasmid carrying the <i>cspC</i> 5'UTR in which 38U and 41U were substituted by C                                                                                                                                                              | This study          |
| pMAD                                             | <i>E. coli</i> - <i>S. aureus</i> shuttle vector with a thermosensitive origin of replication for Gram-positive bacteria. It contains the <i>bgaB</i> gene that encodes β-galactosidase under the control of a constitutive promoter. Amp <sup>R</sup> -Erm <sup>R</sup> | (8)                 |
| pMAD_Δ <i>cspA</i>                               | pMAD plasmid containing the allele for the deletion of the <i>cspA</i> gene                                                                                                                                                                                              | (4)                 |
| pMAD_Δ <i>cspB</i>                               | pMAD plasmid containing the allele for the deletion of the <i>cspB</i> gene                                                                                                                                                                                              | (5)                 |
| pMAD_Δ <i>cspC</i>                               | pMAD plasmid containing the allele for the deletion of the <i>cspC</i> gene                                                                                                                                                                                              | (5)                 |
| pMAD_Δ24 <i>cspB</i>                             | pMAD plasmid containing the allele for the deletion of the first 24 nucleotides of the <i>cspB</i> gene                                                                                                                                                                  | This study          |
| pMAD_Δ24 <i>cspC</i>                             | pMAD plasmid containing the allele for the deletion of the first 24 nucleotides of the <i>cspC</i> gene                                                                                                                                                                  | This study          |
| pMAD_Δ24 <i>cspB</i> <sup>3xF</sup>              | pMAD plasmid containing the allele for the deletion of the first 24 nucleotides of the <i>cspB</i> <sup>3xF</sup> gene                                                                                                                                                   | This study          |
| pMAD_Δ24 <i>cspC</i> <sup>3xF</sup>              | pMAD plasmid containing the allele for the deletion of the first 24 nucleotides of the <i>cspC</i> <sup>3xF</sup> gene                                                                                                                                                   | This study          |

**Table S3. Oligonucleotides used in this study**

| Oligonucleotide name                                                                              | Sequence <sup>a</sup>                                                                                             |
|---------------------------------------------------------------------------------------------------|-------------------------------------------------------------------------------------------------------------------|
| <b>Construction of pMAD plasmid for 24 deletion of <i>cspB</i> gene</b>                           |                                                                                                                   |
| CspB_A EcoRI                                                                                      | GAATTCAACTGGTATAACGTCATTG                                                                                         |
| CspB_D24_Izq                                                                                      | AAGACCAACTATACGCTCAT                                                                                              |
| CspB_D24_Drcha                                                                                    | ATGAGCGTATAGTTGGTCTTATTGTAGTGTATTTGTTTAGAATATCCT                                                                  |
| CspB_D BamHI                                                                                      | GGATCCTTAGTTGTTTATTGGAATTG                                                                                        |
| <b>Construction of pMAD plasmid for 24 deletion of <i>cspC</i> gene</b>                           |                                                                                                                   |
| CspC_A BglII                                                                                      | AGATCTTTAGTTCGTCAAGGCTTGG                                                                                         |
| CspC_D24_Izq                                                                                      | AACTTTCATTATACACTTTT                                                                                              |
| CspC_D24_Drcha                                                                                    | AAAAGTGTATAATGAAAGTTATGTGAGTTATTTATATAGAATATTCTC                                                                  |
| CspC_D BamHI                                                                                      | GGATCCCTCAATAATTAATCAGTCTTAA                                                                                      |
| <b>Construction of pMAD plasmid for chromosomal 3xFLAG-labelling of the <i>cspB</i> gene</b>      |                                                                                                                   |
| cspB_A EcoRI                                                                                      | GAATTCAACTGGTATAACGTCATTG                                                                                         |
| 3xFcspB_B                                                                                         | TTATAATCACCGTCATGGTCTTTGTAGTCAACAGTTTGTACGTTAACTGC                                                                |
| 3xFcspB_C                                                                                         | <u>GACTACAAAGACCATGACGGTGATTATAAAGATCATGATATCGACTACA</u><br><u>AAGATGACGACGATAAATAATCTTACAACATAAAACGACTCATTA</u>  |
| CspB_D BamHI                                                                                      | GGATCCTTAGTTGTTTATTGGAATTG                                                                                        |
| <b>Construction of pMAD plasmid for chromosomal 3xFLAG-labelling of the <i>cspC</i> gene</b>      |                                                                                                                   |
| CspC_A BglII                                                                                      | AGATCTTTAGTTCGTCAAGGCTTGG                                                                                         |
| 3xFcspC_B                                                                                         | ACCGTCATGGTCTTTGTAGTCCATTTAACTACGTTTGCAGCTT                                                                       |
| 3xFcspC_C                                                                                         | GACTACAAAGACCATGACGGTGATTATAAAGATCATGATATCGACTACA<br>AAGATGACGACGATAAATAATTTTAACTTATTCAAACAGT                     |
| CspC_D BamHI                                                                                      | GGATCCCTCAATAATTAATCAGTCTTAA                                                                                      |
| <b>Construction of pHRG plasmid</b>                                                               |                                                                                                                   |
| pHyper-RBSicaR-GFP                                                                                | GCATGCAATTTTGC AAAAGTTGTTGACTTTATCTACAAGGTGTGGCATA<br>ATGAATTCAGTAGGGGTTATAAAAATTGACTAGTAAAGGAGAAGAACT<br>TTTCACT |
| GFPend-Ascl                                                                                       | GGCGCGCCTTATTTGTATAGTTCATCCATGCCAT                                                                                |
| <b>Construction of plasmids expressing 5'UTR <i>cspB</i> and <i>cspC</i> mRNA and its mutants</b> |                                                                                                                   |
| 5UTR_cspB_FW_EcoRI                                                                                | GAATTCACGTAATAAAAAGCTCGTGAAT                                                                                      |
| 5UTR_cspB_RV_SpeI                                                                                 | ACTAGTTGTACCGTTATTCATATAGAAAACC                                                                                   |
| 5'UTR_cspC_FW_EcoRI                                                                               | GAATTC AAGTAATAAAGAGCGTGAAGAAA                                                                                    |
| 5'UTR_cspC_RV_SpeI                                                                                | ACTAGTTGTACCGTTATTCATATTGAATACC                                                                                   |
| M5B_D24_EcoRI                                                                                     | GAATTCATTGTAGTGTATTTGTTTAGAATATCC                                                                                 |
| M5C_D24_EcoRI                                                                                     | GAATTCATGTGAGTTATTTATATAGAATATTCTCCT                                                                              |
| M5B_C50G_EcoRI                                                                                    | GAATTCACGTAATAAAAAGCTCGTGAATTAATTGTAGTGTATTTGTTAG<br>AATATGCTCTTTTTAGTTATGAAT                                     |
| M5B_UU55AA_EcoRI                                                                                  | GAATTCACGTAATAAAAAGCTCGTGAATTAATTGTAGTGTATTTGTTAG<br>AATATCCTCTAATTTAGTTATGAAT                                    |
| M5B_UAU47AA_EcoRI                                                                                 | GAATTCACGTAATAAAAAGCTCGTGAATTAATTGTAGTGTATTTGTTAG<br>AAAACCTCTTTTTT                                               |
| M5C_UU48A_EcoRI                                                                                   | GAATTC AAGTAATAAAGAGCGTGAAGAAAAATGTGAGTTATTTATATAGA<br>ATAACTCCTTTTCATT                                           |
| M5B_2U_26_2_EcoRI                                                                                 | GAATTCACGTAATAAAAAGCTCGTGAATTA AAAAGTAGTGTATTTG                                                                   |
| M5B_U38C-U41C_EcoRI                                                                               | GAATTCACGTAATAAAAAGCTCGTGAATTA ATTGTAGTGTATTCGCTAG<br>AATATCCT                                                    |
| <b>Probe for Northern blot assays</b>                                                             |                                                                                                                   |
| anti-GFP probe                                                                                    | TTATTTGTATAGTTCATCCATGCCATGTGTAATCCAGCAGCTGTTACAA<br>ACTCAAGAAGGACCATGTGG                                         |
| anti-3xFLAG_probe                                                                                 | TTTATCGTCGTCATCTTTGTAGTGCATATCATGATCTTTATAATCACCGT<br>CATGGTCTTTGTAGTC                                            |

Continued in the following page

**Table S3. Continued**

| Oligonucleotide name                       | Sequence <sup>a</sup>                                                                  |
|--------------------------------------------|----------------------------------------------------------------------------------------|
| <b>Molecular beacons</b>                   |                                                                                        |
| 5UTR_B_FAM_IQ                              | FAM_CGTAATAAAAGCTCGTGAATTAATTGTAGTGTATTTGTTTAGAAT<br>ATCCTCTTTTTTAGTTATGAATTTGTTACA_IQ |
| 5UTR_C_FAM_IQ                              | FAM_AGTAATAAAGAGCGTGAAGAAAAATGTGAGTTATTTATATAGAATA<br>TTCTCCTTTTCATTTATGAATTTGTTACA_IQ |
| <b>Synthesis of <i>cspB</i> 5'UTR mRNA</b> |                                                                                        |
| T7_5UTRcspB_Fw                             | TAATACGACTCACTATAGGGACGTAATAAAAGCTCGTGAA                                               |
| 5UTR_cspB_RV_SpeI                          | ACTAGTTGTACCGTTATTCATATAGAAAACC                                                        |
| <b>Synthesis of <i>cspC</i> 5'UTR mRNA</b> |                                                                                        |
| T7_5UTRcspC_fw                             | TAATACGACTCACTATAGGGAAGTAATAAAGAGCGTGAAG                                               |
| 5'UTR_cspC_RV_SpeI                         | ACTAGTTGTACCGTTATTCATATTGAATACC                                                        |

<sup>a</sup> Restriction enzymes sites and 3xFLAG sequences are indicated in italic and underlined font, respectively

**Table S4.** Blastn comparative analysis showing the conservation of the *S. aureus* CspB thermoswitch among different *Staphylococcus* species.

| Staphylococcus species     | Strain       | Accession ID  | Total CSPs | Thermo switch | Locus tag ID | csp genes including a thermoswitch / Sequence identity to cspB 5'UTR (%) |     |             |    |
|----------------------------|--------------|---------------|------------|---------------|--------------|--------------------------------------------------------------------------|-----|-------------|----|
| <i>S. aureus</i>           | NCTC 8325    | NC_007795.1   | 3          | 2             |              | <i>cspB</i>                                                              | 100 | <i>cspC</i> | 85 |
| <i>S. argenteus</i>        | MSHR1132     | NC_016941.1   | 3          | 2             | SAMSHR1132_  | RS13405                                                                  | 100 | RS03890     | 85 |
| <i>S. schweitzeri</i>      | NCTC13712    | NZ_LR134304.1 | 3          | 2             | EL116_       | RS13645                                                                  | 98  | RS04340     | 87 |
| <i>S. simiae</i>           | NCTC13838    | NZ_LT906460.1 | 3          | 2             | CKV88_       | RS12300                                                                  | 96  | RS03665     | 85 |
| <i>S. succinus</i>         | 14BME20      | NZ_CP018199.1 | 3          | 2             | BK815        | RS09355                                                                  | 94  | RS08380     | 75 |
| <i>S. devriesei</i>        | NCTC13828    | UHCZ01000002  | 3          | 2             | DYD94_       | RS10710                                                                  | 89  | RS10715     | 87 |
| <i>S. pasteurii</i>        | SP1          | NC_022737.1   | 3          | 2             | STP1_        | RS07870                                                                  | 88  | RS09745     | 83 |
| <i>S. warneri</i>          | NCTC11044    | NZ_LR134269.1 | 3          | 2             | EL082_       | RS11195                                                                  | 88  | RS09370     | 83 |
| <i>S. cornubiensis</i>     | NW1          | FXUZ01000007  | 3          | 2             | CCE82_       | RS08550                                                                  | 88  | RS08575     | 87 |
| <i>S. felis</i>            | ATCC 49168   | NZ_CP027770.1 | 3          | 2             | C7J90_       | RS03590                                                                  | 87  | RS00805     | 77 |
| <i>S. massiliensis</i>     | CCUG 55927   | NZ_JH815593.1 | 3          | 2             | A33S_        | RS0106390                                                                | 93  | RS0107335   | 89 |
| <i>S. edaphicus</i>        | CCM 8730     | MRZN01000034  | 3          | 1             | BTJ66_       | RS13275                                                                  | 94  |             |    |
| <i>S. saprophyticus</i>    | ATCC 15305   | NC_007352.1   | 3          | 1             | SSP_         | RS12515                                                                  | 93  |             |    |
| <i>S. stepanovicii</i>     | NCTC13839    | NZ_LT906462.1 | 3          | 1             | CKV64_       | RS00450                                                                  | 93  |             |    |
| <i>S. petrasii</i>         | NCTC13835    | UHDU01000001  | 2          | 1             | DYD86_       | RS11030                                                                  | 91  |             |    |
| <i>S. haemolyticus</i>     | JCSC1435     | NC_007168.1   | 2          | 1             | SH_          | RS11570                                                                  | 91  |             |    |
| <i>S. lutrae</i>           | ATCC 700373  | NZ_CP020773.1 | 2          | 1             | B5P37_       | RS08760                                                                  | 89  |             |    |
| <i>S. pseudintermedius</i> | HKU10-03     | NC_014925.1   | 2          | 1             | SPSINT_      | RS03305                                                                  | 88  |             |    |
| <i>S. delphini</i>         | NCTC12225    | NZ_LR134263.1 | 2          | 1             | EL101_       | RS10200                                                                  | 88  |             |    |
| <i>S. intermedius</i>      | NCTC 11048   | UHDP01000003  | 2          | 1             | DYA52_       | RS11680                                                                  | 88  |             |    |
| <i>S. lugdunensis</i>      | HKU09-01     | NC_013893.1   | 2          | 1             | SLGD_        | RS00875                                                                  | 87  |             |    |
| <i>S. hominis</i>          | C80          | NZ_GL545254.1 | 2          | 1             | HMPREF0798_  | RS00715                                                                  | 87  |             |    |
| <i>S. schleiferi</i>       | 2317-03      | NZ_CP010309.1 | 2          | 1             | RN70_        | RS09475                                                                  | 88  |             |    |
| <i>S. fleurettii</i>       | FDAARGOS_682 | NZ_CP046351.1 | 2          | 1             | FOB90_       | RS10505                                                                  | 88  |             |    |
| <i>S. caprae</i>           | 26D          | NZ_CP031271.1 | 2          | 1             | DWB96_       | RS10220                                                                  | 84  |             |    |
| <i>S. saccharolyticus</i>  | NCTC11807    | UHDZ01000001  | 2          | 1             | DYE57_       | RS09170                                                                  | 83  |             |    |
| <i>S. auricularis</i>      | NCTC12101    | NZ_LS483491.1 | 2          | 1             | DQL57_       | RS02425                                                                  | 83  |             |    |
| <i>S. epidermidis</i>      | ATCC 14990   | NZ_CP035288.1 | 2          | 1             | EQW00_       | RS09740                                                                  | 83  |             |    |
| <i>S. capitis</i>          | AYP1020      | NZ_CP007601.1 | 2          | 1             | ayp1020_     | RS00755                                                                  | 83  |             |    |
| <i>S. chromogenes</i>      | 20B          | NZ_CP031471.1 | 2          | 1             | DWB92_       | RS09990                                                                  | 81  |             |    |
| <i>S. hyicus</i>           | ATCC 11249   | NZ_CP008747.1 | 2          | 1             | SHYC_        | RS09620                                                                  | 80  |             |    |
| <i>S. agnetis</i>          | 908          | NZ_CP009623.1 | 2          | 1             | EP23_        | RS00105                                                                  | 80  |             |    |
| <i>S. rostri</i>           | DSM 21968    | PPRF01000144  | 2          | 1             | CD122_       | RS11505                                                                  | 80  |             |    |
| <i>S. muscae</i>           | ATCC 49910   | NZ_CP027848.1 | 2          | 1             | C7J88_       | RS09350                                                                  | 80  |             |    |
| <i>S. microti</i>          | DSM 22147    | JXWY01000057  | 2          | 1             | TP70_        | RS08325                                                                  | 80  |             |    |
| <i>S. equorum</i>          | KS1039       | NZ_CP013114.1 | 2          | 1             | SE1039_      | RS00970                                                                  | 77  |             |    |
| <i>S. nepalensis</i>       | JS11         | NZ_CP017466.1 | 2          | 1             | BJG89_       | RS13175                                                                  | 78  |             |    |
| <i>S. carnosus</i>         | TM300        | NC_012121.1   | 2          | 1             | SCA_         | RS02225                                                                  | 76  |             |    |
| <i>S. piscifermentans</i>  | NCTC13836    | NZ_LT906447.1 | 2          | 1             | CKV71_       | RS10125                                                                  | 76  |             |    |
| <i>S. condimentii</i>      | DSM 11674    | NZ_CP015114.1 | 2          | 1             | A4G25_       | RS05475                                                                  | 76  |             |    |
| <i>S. gallinarum</i>       | DSM 20610    | JXCF01000001  | 2          | 1             | SH09_        | RS00140                                                                  | 75  |             |    |
| <i>S. cohnii</i>           | 532          | LATV01000001  | 2          | 1             | XA21_        | RS00240                                                                  | 76  |             |    |
| <i>S. xylosum</i>          | SMQ-121      | NZ_CP008724.1 | 2          | 1             | SXYLSMQ121_  | RS11945                                                                  | 74  |             |    |
| <i>S. pettenkoferi</i>     | VCU012       | AGUA01000053  | 1          | 0             |              |                                                                          |     |             |    |
| <i>S. kloosii</i>          | NCTC12415    | UHDQ01000002  | 1          | 0             |              |                                                                          |     |             |    |

**Table S5.** Prediction of putative mutually exclusive alternative structures in the 5'UTRs of *csp* genes.

| Bacterial species                                | <i>csp</i> gene          | 5'UTR length (nt) <sup>a</sup> | Alternative structures |
|--------------------------------------------------|--------------------------|--------------------------------|------------------------|
| <b><i>Enterococcus faecalis</i> V583</b>         | <b>(NC_004668)</b>       |                                |                        |
|                                                  | <i>EF0781</i>            | 116                            |                        |
|                                                  | <i>EF1367</i>            | 134                            | √                      |
|                                                  | <i>EF1726</i>            | 32                             |                        |
|                                                  | <i>EF1991</i>            | 117                            | √                      |
|                                                  | <i>EF2925</i>            | 109                            |                        |
|                                                  | <i>EF2939</i>            | ND                             |                        |
| <b><i>Bacillus subtilis</i> 168</b>              | <b>(NC_000964)</b>       |                                |                        |
|                                                  | <i>cspC</i>              | 115                            |                        |
|                                                  | <i>cspB</i>              | 119                            | √                      |
|                                                  | <i>cspD</i>              | 85                             |                        |
| <b><i>Clostridium perfringens</i> str. 13</b>    | <b>(NC_003366)</b>       |                                |                        |
|                                                  | <i>cspL</i>              |                                | √                      |
| <b><i>Pseudomonas aeruginosa</i> PA14</b>        | <b>(NC_008463)</b>       |                                |                        |
|                                                  | <i>PA14_05960 (cspB)</i> | 151                            | √                      |
|                                                  | <i>PA14_21760 (capB)</i> | 151                            | √                      |
|                                                  | <i>PA14_30200 (cspD)</i> | 109                            |                        |
|                                                  | <i>PA14_39180</i>        | ND                             |                        |
|                                                  | <i>PA14_49410</i>        | ND                             |                        |
|                                                  | <i>PA14_51840</i>        | ND                             |                        |
| <b><i>Salmonella</i> Typhimurium str. SL1344</b> | <b>(NC_016810)</b>       |                                |                        |
|                                                  | <i>cspA</i>              | 164                            | √                      |
|                                                  | <i>cspB</i>              | 145                            | √                      |
|                                                  | <i>cspC</i>              | ND                             |                        |
|                                                  | <i>cspD</i>              | 87                             |                        |
|                                                  | <i>cspE</i>              | 43                             |                        |
|                                                  | <i>cspH</i>              | 23                             |                        |

<sup>a</sup> 5'UTR length annotated using previous transcriptomic data (1, 2). ND: not determined.



SUPPLEMENTARY FIGURES

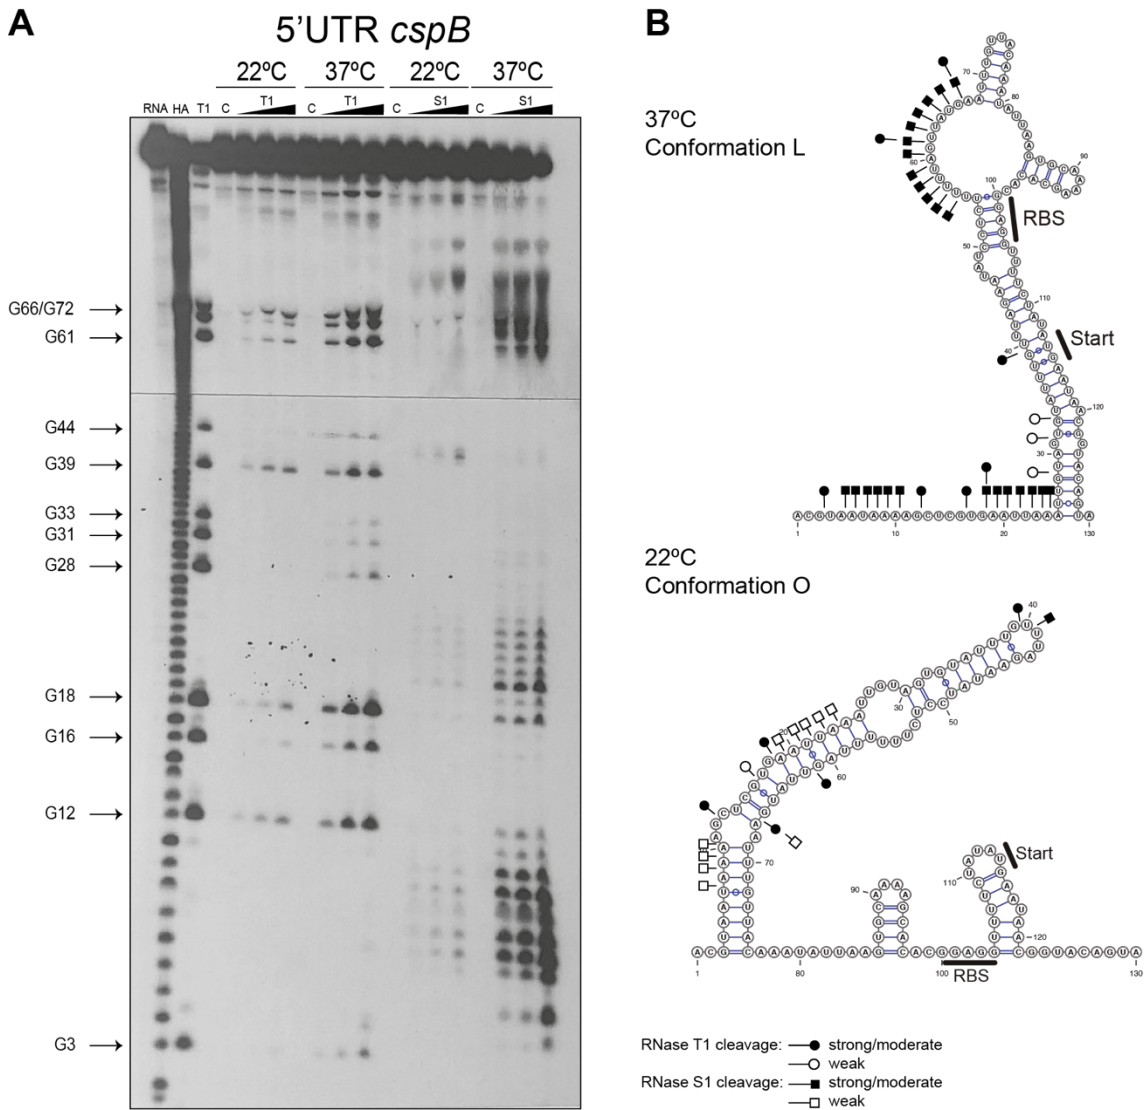

**Figure S1. Enzymatic probing at different temperatures of the alternative structures found in the *cspB*.** (A) Electrophoretic migration of the radiolabelled *cspB* 5'UTR after RNase T1 (T1) and RNase S1 (S1) cleavage at 22 and 37°C. Samples were subjected to denaturation at 90°C and renaturation at 22 or 37°C for 15 min. Lane C: incubation control in the absence of RNase T1/S1. Cleavage reactions were performed in the presence of increasing concentrations of T1:  $1 \times 10^{-3}$  U/ $\mu$ l,  $2 \times 10^{-2}$  U/ $\mu$ l and  $5 \times 10^{-2}$  U/ $\mu$ l or S1:  $5 \times 10^{-5}$  U/ $\mu$ l,  $2 \times 10^{-5}$  U/ $\mu$ l and  $1 \times 10^{-5}$  U/ $\mu$ l. Lanes RNA: RNA control; HA: alkaline hydrolysis ladder and T1: RNase T1 control. (B) Model of *cspB* 5'UTR secondary structure at 37°C (conformation L) and 22°C (conformation O) derived from the probing data shown in A. The RBS sequence and start codon are indicated.

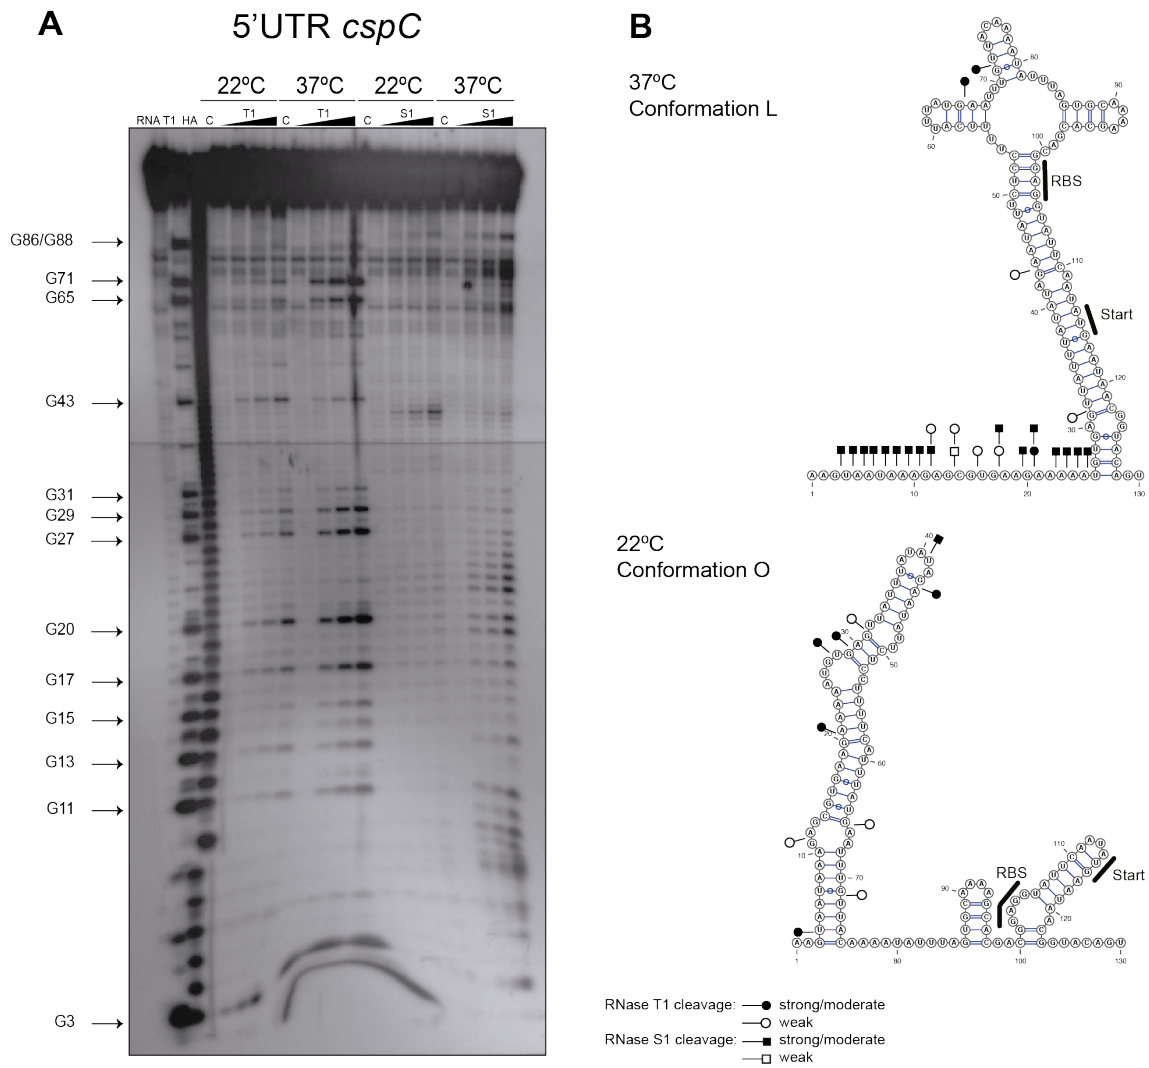

**Figure S2. Enzymatic probing at different temperatures of the alternative structures found in the *cspC* 5'UTRs. (A) Electrophoretic migration of the radiolabelled *cspC* 5'UTR after RNase T1 (T1) and RNase S1 (S1) cleavage at 22 and 37°C. Samples were treated as previously described in Figure S1. (B) Model of *cspC* 5'UTR secondary structure at 37°C (conformation L) and 22°C (conformation O) derived from the probing data shown in A. The RBS sequence and start codon are indicated.**

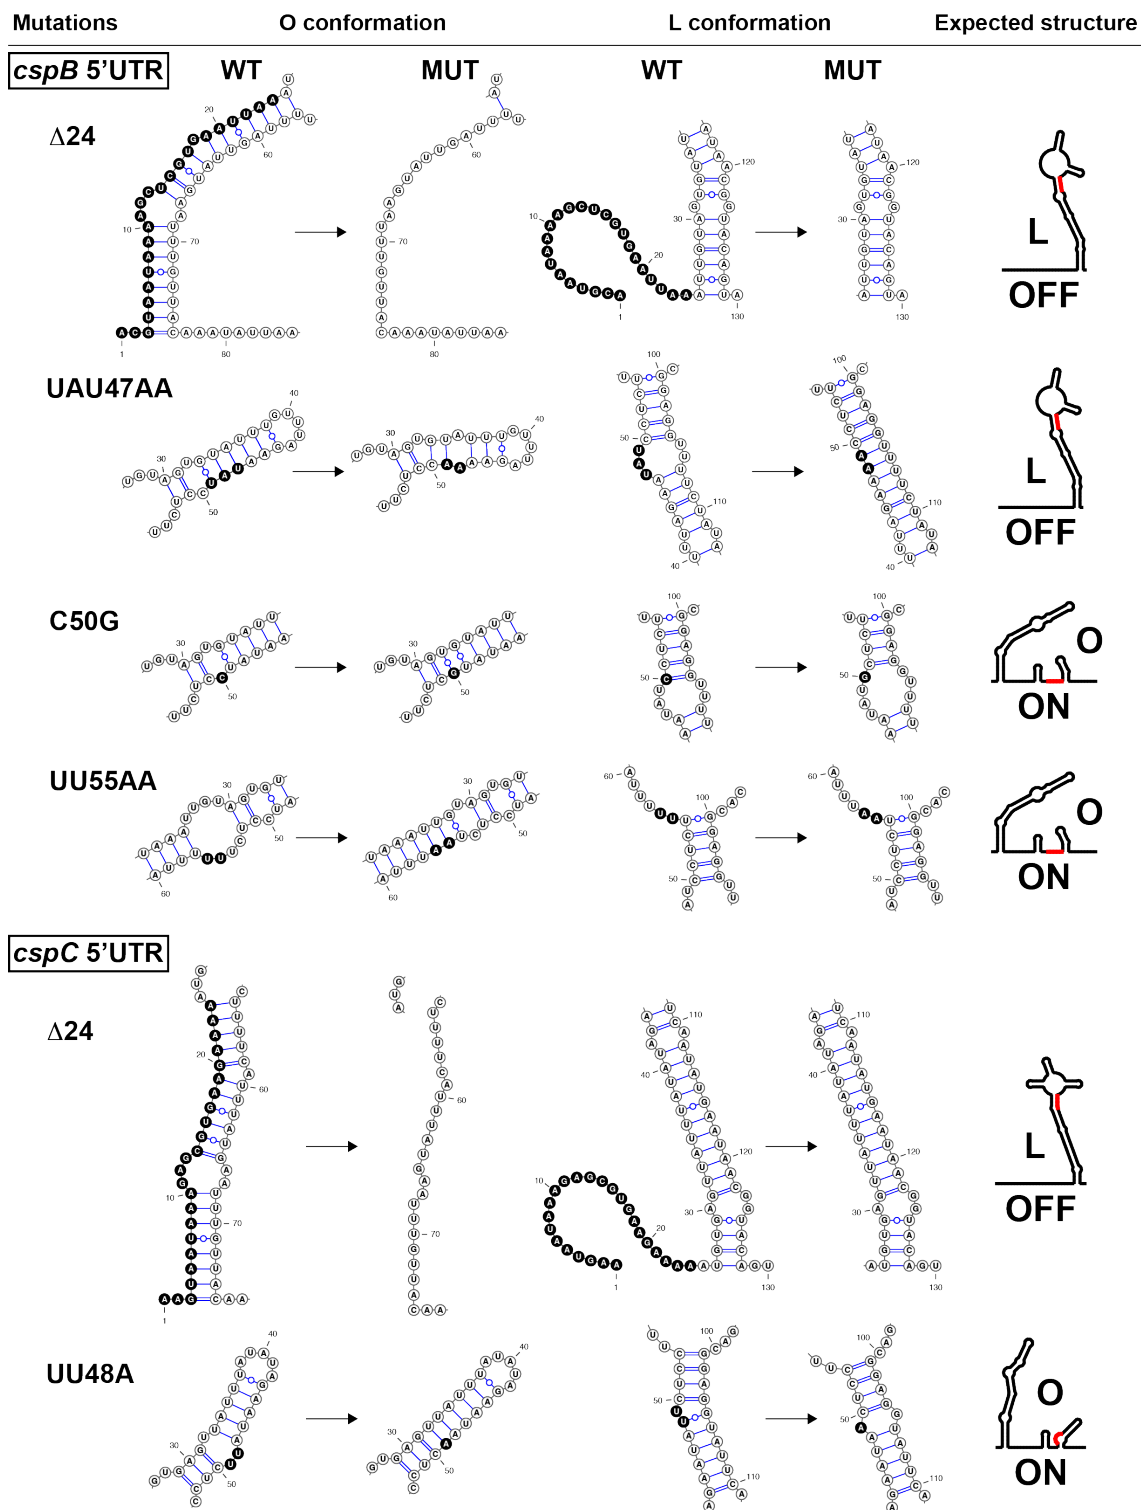

**Figure S3. Schematic representation of the *cspB* and *cspC* 5'UTR mutations.** The wild type (WT) and mutated (MUT) structures are represented for the O and L conformations. Mutated nucleotides are depicted in black. The expected mutated 5'UTR structure O or L (translation ON/OFF) is also showed.

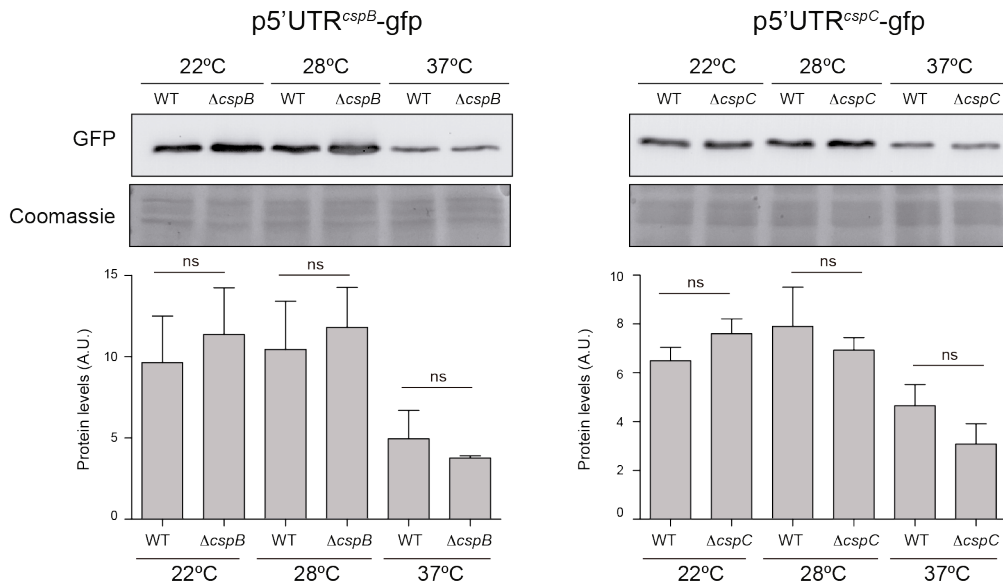

**Figure S4. The CspB and CspC protein expression is not auto-regulated in *S. aureus*.** Western blot analyses of GFP levels expressed from the *S. aureus* WT,  $\Delta cspB$  and  $\Delta cspC$  strains carrying the *cspB* and *cspC* 5'UTR-GFP reporters, which were grown in MH at 22, 28 and 37°C. The GFP production was developed as described in Figure 2. Bar plots show the mean and standard deviation of the GFP levels from three independent biological replicates, which were determined by densitometry of protein bands using ImageJ (<https://imagej.nih.gov/ij/>). Asterisk represent statistical significance ( $p < 0.05$ , Mann-Whitney U test); ns, not significant. Representative images from the triplicates are shown.

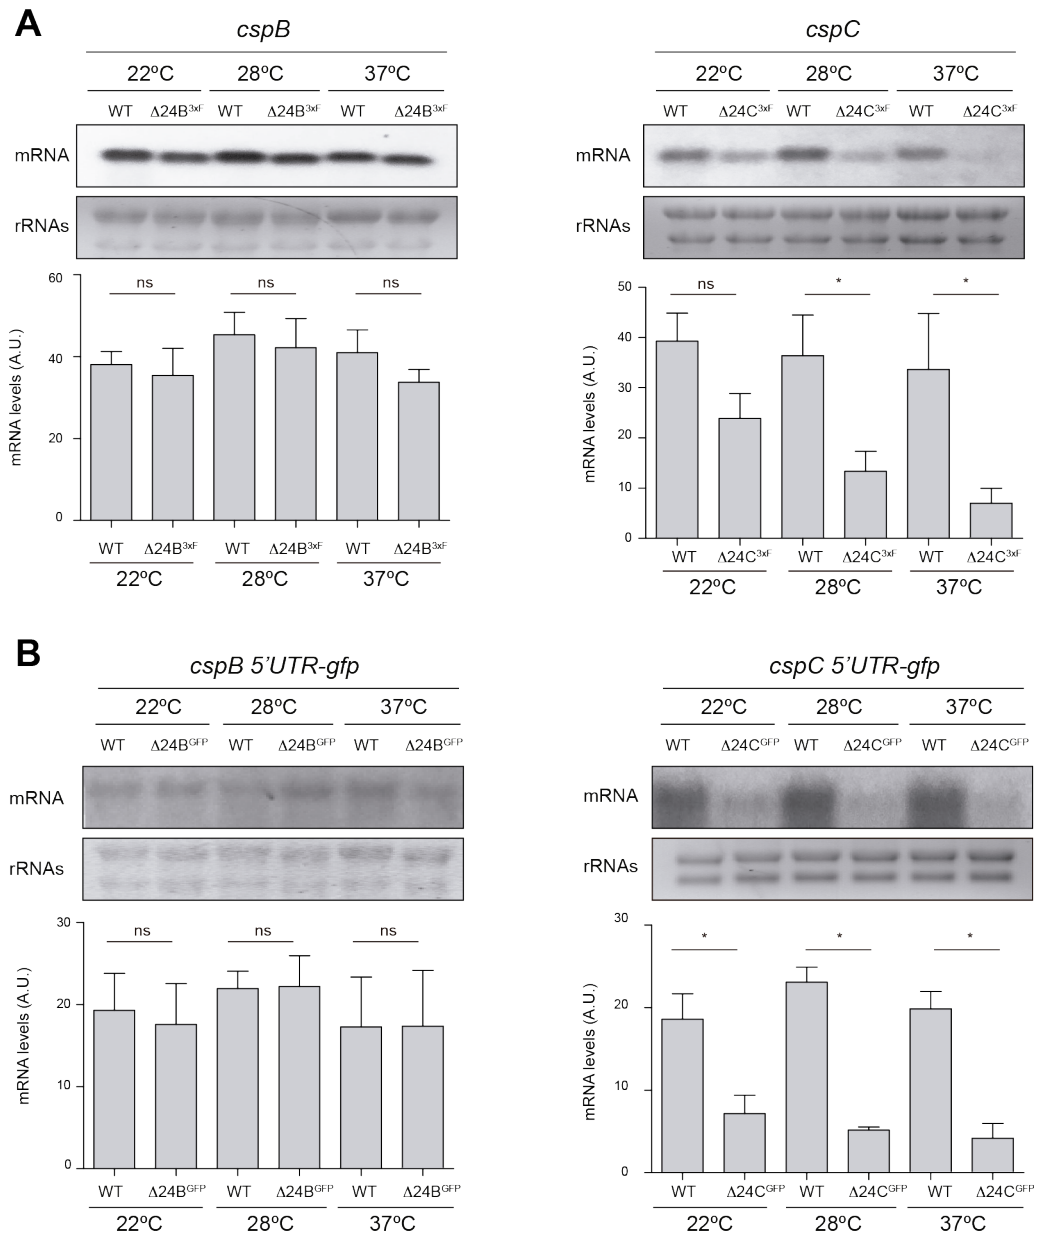

**Figure S5. Different effects on the mRNAs levels when deleting the first 24 nucleotides in *cspB* and *cspC* 5'UTRs.** (A) Northern blot showing the chromosomal expression of *cspB*<sup>3x $F$</sup>  and *cspC*<sup>3x $F$</sup>  mRNAs from the WT and  $\Delta 24$  strains grown in MH at 22, 28 and 37°C. (B) Northern blot results of the chimeric 5'UTR-gfp mRNA levels expressed from the *S. aureus* carrying the *cspB* and *cspC* WT and  $\Delta 24$  5'UTR-GFP translational-reporter plasmids after growth in MH at 22, 28 and 37°C. rRNAs stain gel portions are included as loading controls. Bar plots represent the mean and standard deviation of mRNAs levels from three independent biological replicates, which were determined by densitometry of protein bands using ImageJ (<https://imagej.nih.gov/ij/>). Asterisk represents statistical significance ( $p < 0.05$ , Mann-Whitney U test); ns, not significant. Representative images from the triplicates are shown.

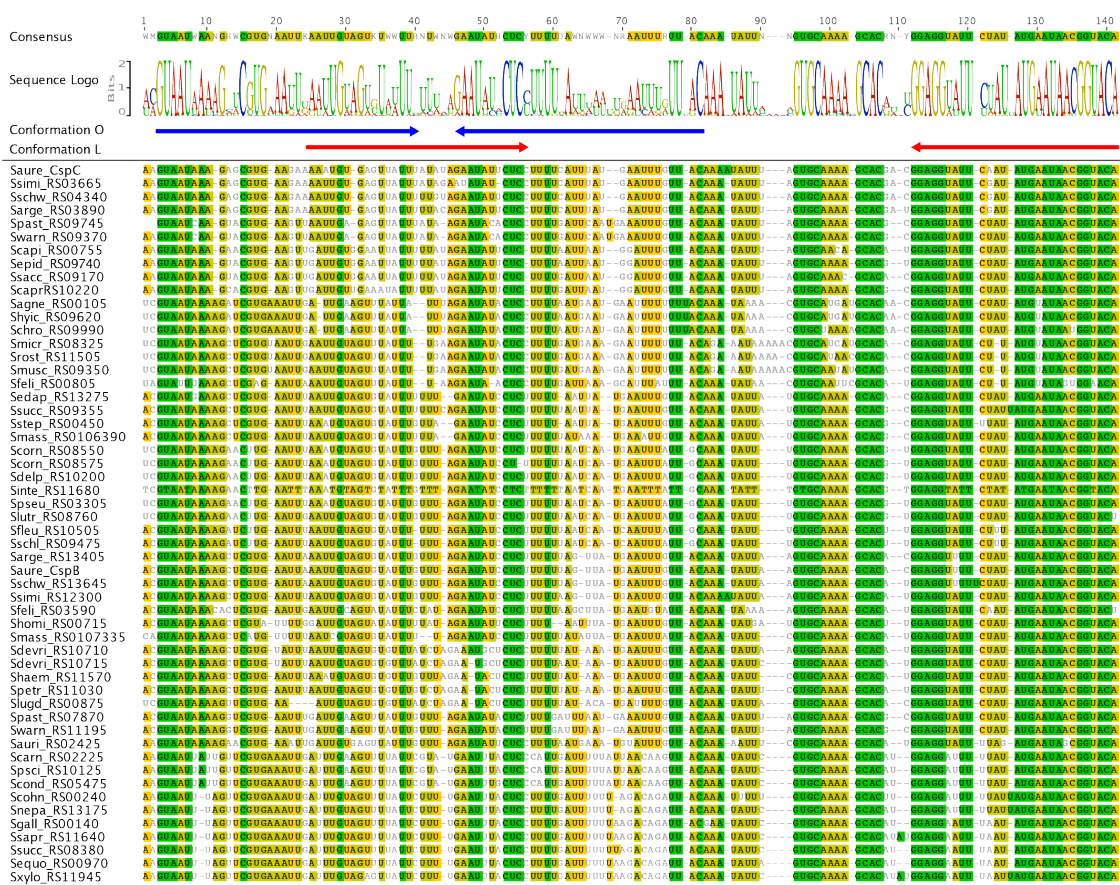

**Figure S6. Multiple sequence alignments of *csp* 5'UTRs from different *Staphylococcus* species.** The consensus sequence and sequence logo are shown. Blue and red arrows represent the nucleotides that form conformation O or L, respectively. Nucleotides were coloured in function of their degree of identity as follows: dark green 100%, light green 80-99%, yellow 60-89% and white less that 60%. *Saure*, *S. aureus*; *Ssimi*, *S. simiae*; *Sschw*, *S. schweitzeri*; *Sarge*, *S. argenteus*; *Spast*, *S. pasteurii*; *Swarn*, *S. warneri*; *Scapi*, *S. capitis*; *Sepid*, *S. epidermidis*; *Ssacc*, *S. saccharolyticus*; *Scapra*, *S. caprae*; *Sagne*, *S. agnetis*; *Shyci*, *S. hycus*; *Schro*, *S. chromogenes*; *Smusc*, *S. muscae*; *Sflii*, *S. felis*; *Sedap*, *S. edaphicus*; *Ssucc*, *S. succinus*; *Sstep*, *S. stepanovicii*; *Smass*, *S. massiliensis*; *Scorn*, *S. cornubiensis*; *Sdelp*, *S. delphini*; *Sinte*, *S. intermedius*; *Spseu*, *S. pseudointermedius*; *Slutr*, *S. lutrae*; *Sfleu*, *S. fleurettii*; *Shomi*, *S. hominis*; *Smass*, *S. massiliensis*; *Sdevr*, *S. devriesei*; *Shaem*, *S. haemolyticus*; *Spetr*, *S. petrasii*; *Slugd*, *S. lugdunensis*; *Spast*, *S. pasteurii*; *Sauri*, *S. auricularis*; *Scarn*, *S. carnosus*; *Spsci*, *S. pscifermentans*; *Scond*, *S. condimenti*; *Scohn*, *S. cohnii*; *Snepa*, *S. nepalensis*; *Sgall*, *S. gallinarum*; *Ssapr*, *S. saprophyticus*; *Ssucc*, *S. succinus*; *Sequo*, *S. equorum*; *Sxylo*, *S. xylosus*.

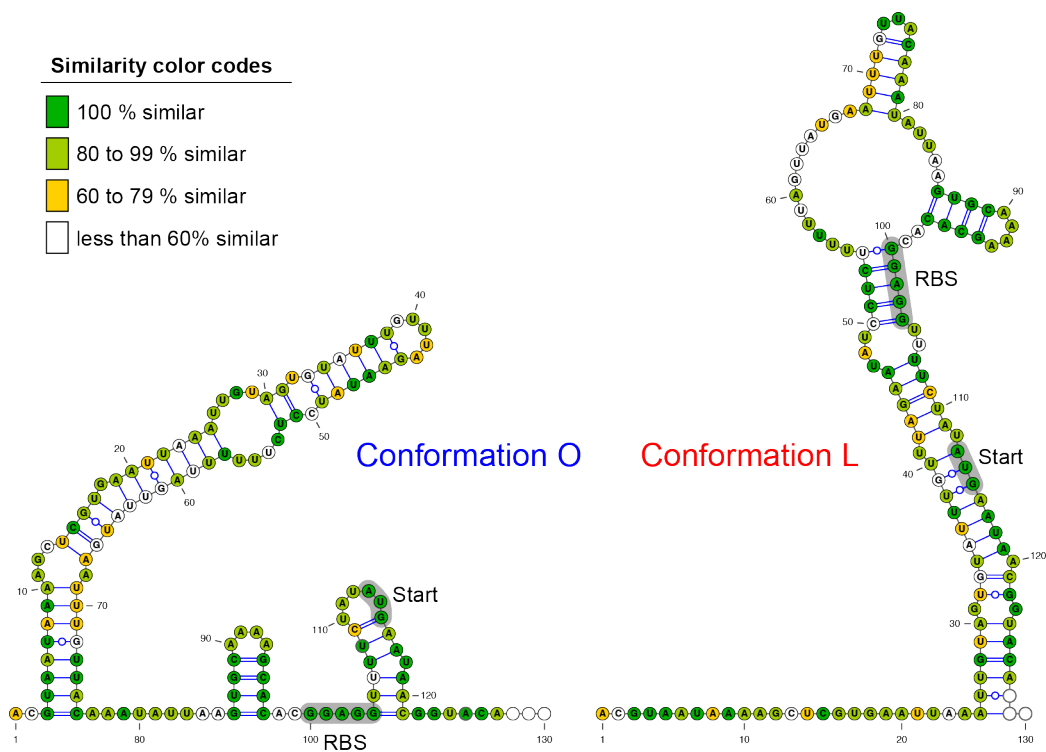

**Figure S7. The nucleotides required for adopting the alternative conformations are highly conserved.** RNA structures were predicted by the mfold web server (9) and visualized and drawn with the VARNA software (10). Nucleotides were coloured according to the identity percentage. The RBS sequence, the start codon and the anti-RBS region are grey shaded.

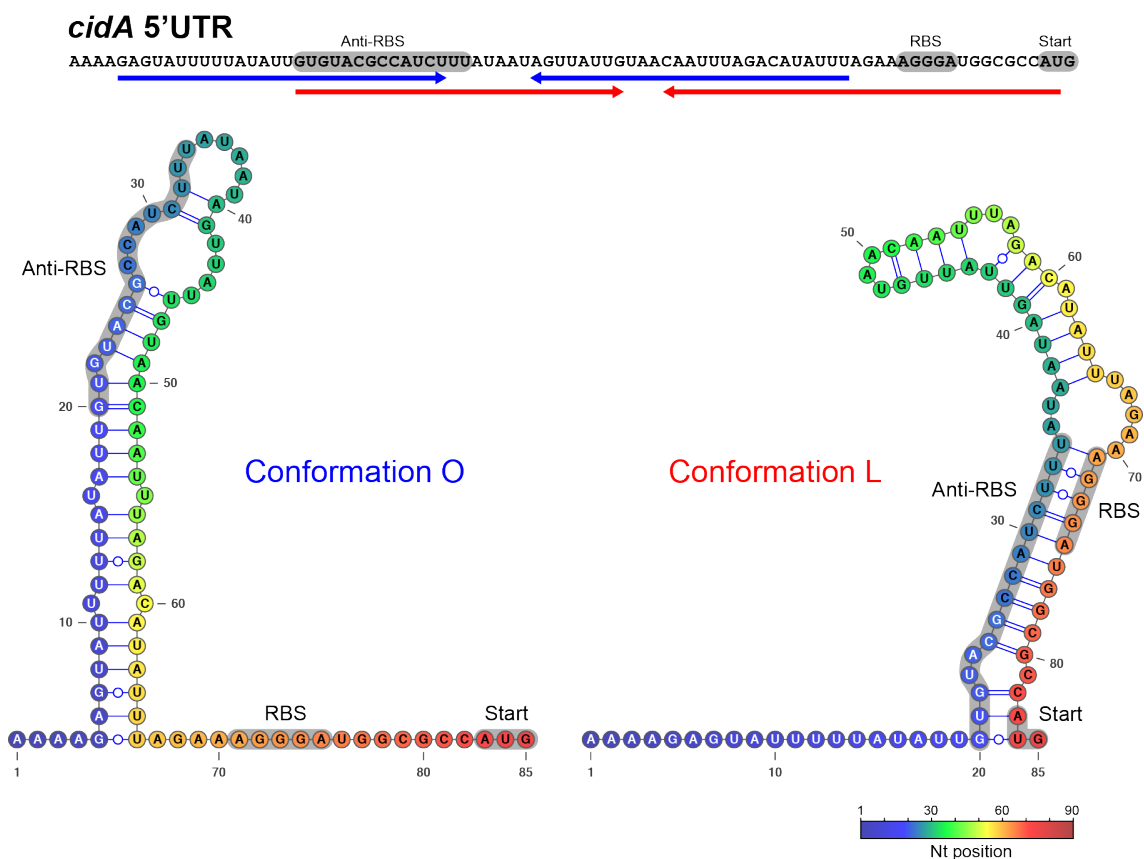

**Figure S8. Putative alternative RNA structures in the longer *cidA* 5'UTR.** RNA structures were predicted by the mfold web server (9) and visualized and drawn with the VARNA software (10). Structures were coloured according to the nucleotide positions as indicated in the colour scale. The arrows below the 5'UTR sequences indicate the interacting nucleotide regions. Blue arrows, conformation O; Red arrows, conformation L. The ribosome binding site (RBS), the start codon and the anti-RBS region are grey shaded.



## SUPPLEMENTARY REFERENCES.

1. Lasa, I., Toledo-Arana, A., Dobin, A., Villanueva, M., de los Mozos, I.R., Vergara-Irigaray, M., Segura, V., Fagegaltier, D., Penadés, J.R., Valle, J., *et al.* (2011) Genome-wide antisense transcription drives mRNA processing in bacteria. *Proc Natl Acad Sci USA*, **108**, 20172–20177.
2. Dötsch, A., Eckweiler, D., Schniederjans, M., Zimmermann, A., Jensen, V., Scharfe, M., Geffers, R. and Häussler, S. (2012) The *Pseudomonas aeruginosa* transcriptome in planktonic cultures and static biofilms using RNA sequencing. *PLoS ONE*, **7**, e31092.
3. Valle, J., Toledo-Arana, A., Berasain, C., Ghigo, J.-M., Amorena, B., Penadés, J.R. and Lasa, I. (2003) SarA and not sigma B is essential for biofilm development by *Staphylococcus aureus*. *Mol Microbiol*, **48**, 1075–1087.
4. Caballero, C.J., Menendez-Gil, P., Catalan-Moreno, A., Vergara-Irigaray, M., García, B., Segura, V., Irurzun, N., Villanueva, M., Ruiz de Los Mozos, I., Solano, C., *et al.* (2018) The regulon of the RNA chaperone CspA and its auto-regulation in *Staphylococcus aureus*. *Nucleic Acids Res*, **46**, 1345–1361.
5. Catalan-Moreno, A., Caballero, C.J., Irurzun, N., Cuesta, S., López Sagasetta, J. and Toledo-Arana, A. (2020) One evolutionarily selected amino acid variation is sufficient to provide functional specificity in the cold shock protein paralogs of *Staphylococcus aureus*. *Mol Microbiol*, **113**, 826–840.
6. Monk, I.R., Shah, I.M., Xu, M., Tan, M.-W. and Foster, T.J. (2012) Transforming the untransformable: application of direct transformation to manipulate genetically *Staphylococcus aureus* and *Staphylococcus epidermidis*. *mBio*, **3**.
7. Charpentier, E., Anton, A.I., Barry, P., Alfonso, B., Fang, Y. and Novick, R.P. (2004) Novel cassette-based shuttle vector system for gram-positive bacteria. *Appl Environ Microbiol*, **70**, 6076–6085.
8. Arnaud, M., Chastanet, A. and Debarbouille, M. (2004) New vector for efficient allelic replacement in naturally nontransformable, low-GC-content, Gram-positive bacteria. *Appl Environ Microbiol*, **70**, 6887–6891.
9. Zuker, M. (2003) Mfold web server for nucleic acid folding and hybridization prediction. *Nucleic Acids Res*, **31**, 3406–3415.
10. Darty, K., Denise, A. and Ponty, Y. (2009) VARNA: Interactive drawing and editing of the RNA secondary structure. *Bioinformatics*, **25**, 1974–1975.
